# Supplementary material for: Valence engineering of ionic molecular crystals: monovalent–divalent phase diagram for biferrocene–tetracyanoquinodimethane salts
Source: Royal Society of Chemistry journal article supplement (doi:10.1039/c7ce00134g), 2017-01-01
Supplement: c7ce00134g1.pdf [file c7ce00134g1.pdf]

## Electronic Supporting Information

### **Valency engineering of ionic molecular crystals: Monovalent–divalent phase diagram for biferrocene–tetracyanoquinodimethane salts**

Tomoyuki Mochida,<sup>\*a</sup> Yusuke Funasako,<sup>a,b</sup> Takahiro Akasaka,<sup>a</sup> Mikio Uruichi<sup>c</sup> and Hatsumi Mori<sup>d</sup>

<sup>a</sup>*Department of Chemistry, Graduate School of Science, Kobe University, Rokkodai, Nada, Hyogo 657-8501, Japan. E-mail: tmochida@platinum.kobe-u.ac.jp; Fax: +81 78 803 5679; Tel: +81 78 803 5679.*

<sup>b</sup>*Department of Applied Chemistry, Faculty of Engineering, Tokyo University of Science, Yamaguchi, Sanyo-Onoda, Yamaguchi 756-0884, Japan*

<sup>c</sup>*Institute for Molecular Science, Myodaiji, Okazaki, Aichi 444-8585, Japan*

<sup>d</sup>*Institute for Solid State Physics, The University of Tokyo, Kashiwanoha, Kashiwa, Chiba 277-8581, Japan*

**Table S1.** Composition, valence state, intramolecular and intermolecular distances, overlap integral in the dimer, and acceptor charges in **1b–4c**.

| Compound              | Valence state                                                 | Fe–Cp <sub>centroid</sub> / Å                     | Intradimer A···A distances <sup>a</sup> / Å ( <i>S</i> <sup>b</sup> ) | Interdimer A···A distances <sup>a</sup> / Å ( <i>S</i> <sup>b</sup> ) | Acceptor charge <sup>c</sup>   |                    |
|-----------------------|---------------------------------------------------------------|---------------------------------------------------|-----------------------------------------------------------------------|-----------------------------------------------------------------------|--------------------------------|--------------------|
| <b>1b<sup>d</sup></b> | (I <sub>2</sub> -bifc)(Cl <sub>1</sub> -TCNQ) <sub>2</sub>    | [D] <sup>+</sup> [A <sub>2</sub> ] <sup>-</sup>   | 1.686, 1.679                                                          | 3.451                                                                 | 7.049                          | -0.61 <sup>e</sup> |
| <b>1c<sup>d</sup></b> | (I <sub>2</sub> -bifc)(F <sub>2</sub> -TCNQ) <sub>2</sub>     | [D] <sup>+</sup> [A <sub>2</sub> ] <sup>-</sup>   | 1.683, 1.673                                                          | 3.406 (19.3×10 <sup>-3</sup> )                                        | 7.010 (5.19×10 <sup>-3</sup> ) | -0.51              |
| <b>1d<sup>d</sup></b> | (I <sub>2</sub> -bifc)(Cl <sub>2</sub> -TCNQ) <sub>2</sub>    | [D] <sup>+</sup> [A <sub>2</sub> ] <sup>-</sup>   | 1.685, 1.677                                                          | 3.506 (16.4×10 <sup>-3</sup> )                                        | 7.114 (4.61×10 <sup>-3</sup> ) | -0.45              |
| <b>2a</b>             | (MeSe <sub>2</sub> -bifc)(F <sub>1</sub> -TCNQ) <sub>2</sub>  | [D] <sup>+</sup> [A <sub>2</sub> ] <sup>-</sup>   | 1.678, 1.674                                                          | 3.404                                                                 | 7.090                          | -0.56              |
| <b>2b</b>             | (MeSe <sub>2</sub> -bifc)(Cl <sub>1</sub> -TCNQ) <sub>2</sub> | [D] <sup>+</sup> [A <sub>2</sub> ] <sup>-</sup>   | 1.680, 1.671                                                          | 3.414                                                                 | 7.207                          | -0.57 <sup>e</sup> |
| <b>3a</b>             | (MeS <sub>2</sub> -bifc)(F <sub>1</sub> -TCNQ) <sub>2</sub>   | [D] <sup>+</sup> [A <sub>2</sub> ] <sup>-</sup>   | 1.680, 1.674                                                          | 3.394                                                                 | 6.973                          | -0.54              |
| <b>3b</b>             | (MeS <sub>2</sub> -bifc)(Cl <sub>1</sub> -TCNQ) <sub>2</sub>  | [D] <sup>+</sup> [A <sub>2</sub> ] <sup>-</sup>   | 1.681, 1.671                                                          | 3.408                                                                 | 7.083                          | -0.40 <sup>e</sup> |
| <b>3c</b>             | (MeS <sub>2</sub> -bifc)(F <sub>2</sub> -TCNQ) <sub>2</sub>   | [D] <sup>2+</sup> [A <sub>2</sub> ] <sup>2-</sup> | 1.709, 1.701                                                          | 3.232 (27.6×10 <sup>-3</sup> )                                        | 7.069 (4.34×10 <sup>-3</sup> ) | -0.88              |
| <b>3d</b>             | (MeS <sub>2</sub> -bifc)(Cl <sub>2</sub> -TCNQ) <sub>2</sub>  | [D] <sup>+</sup> [A <sub>2</sub> ] <sup>-</sup>   | 1.684, 1.678                                                          | 3.500 (17.5×10 <sup>-3</sup> )                                        | 7.253 (7.60×10 <sup>-3</sup> ) | -0.53              |
| <b>4b</b>             | (Et <sub>2</sub> -bifc)(Cl <sub>1</sub> -TCNQ) <sub>2</sub>   | [D] <sup>+</sup> [A <sub>2</sub> ] <sup>-</sup>   | 1.689, 1.673                                                          | 3.421                                                                 | 6.962                          | -0.58 <sup>e</sup> |
| <b>4c</b>             | (Et <sub>2</sub> -bifc)(F <sub>2</sub> -TCNQ) <sub>2</sub>    | [D] <sup>2+</sup> [A <sub>2</sub> ] <sup>2-</sup> | 1.712, 1.707                                                          | 3.283 (25.2×10 <sup>-2</sup> )                                        | 7.074 (3.38×10 <sup>-3</sup> ) | -0.98              |

<sup>a</sup>Centroid–centroid distances. <sup>b</sup>Overlap integrals calculated by the extended Hückel molecular orbital method for salts with non-disordered acceptors (Ref. 13). <sup>c</sup>Estimated from the bond lengths (Ref. 12). <sup>d</sup>Ref. 9. <sup>e</sup>The four bonds opposite to the dominant Cl site were used for the estimation.

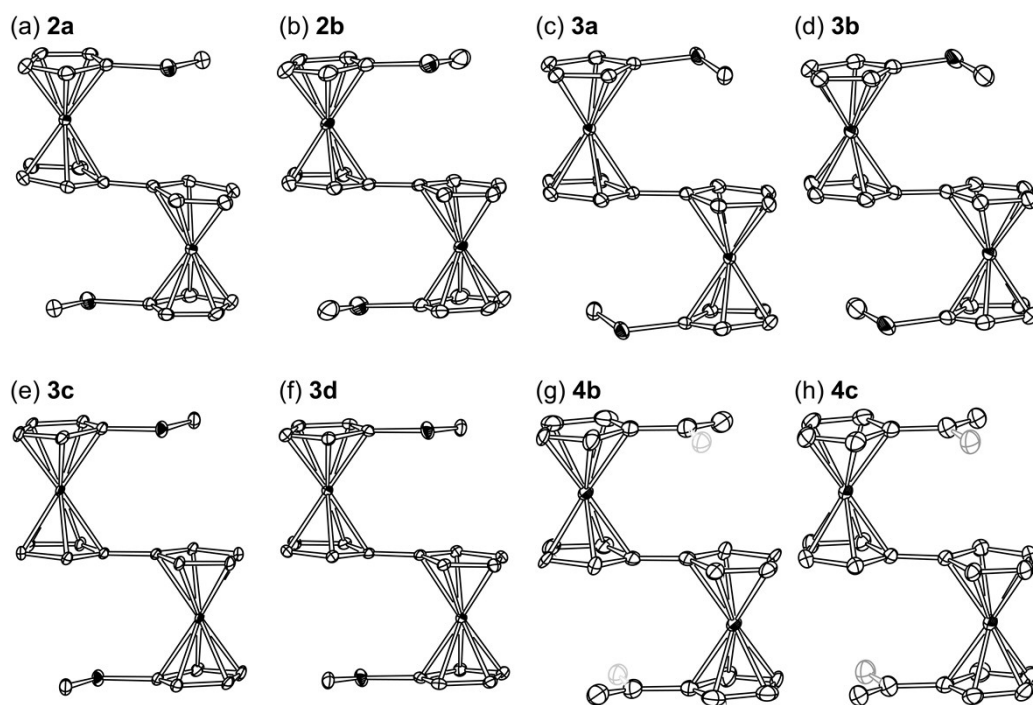

**Fig. S1.** Ortep drawings of the molecular structures of the cation in each salt. One of the disordered moieties in **4b** and **4c** are displayed in gray. Hydrogen atoms have been omitted for clarity.

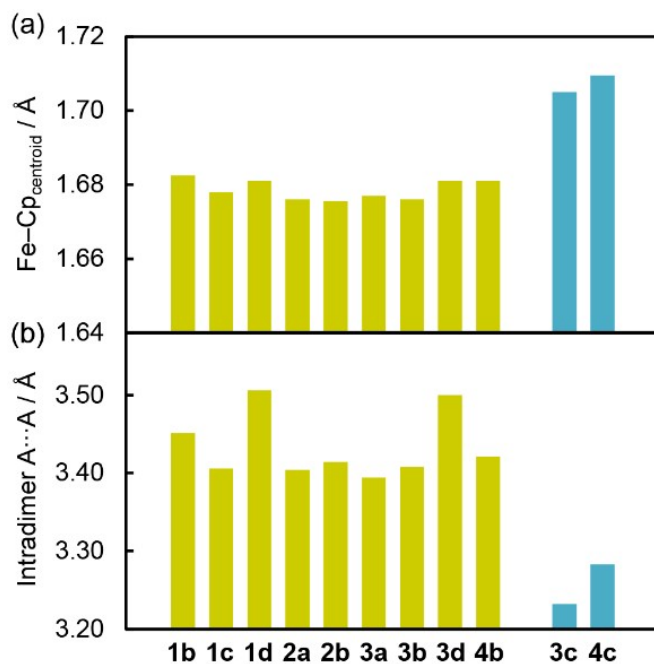

**Fig. S2.** (a) Average Fe–Cp<sub>centroid</sub> distances in the cation and (b) intermolecular distances (centroid–centroid) in the acceptor dimers in monovalent salts (yellow) and divalent salts (blue).

**Table S2.** Crystallographic Parameters.

|                                                                                                   | <b>2a</b>                                                                                     | <b>2b</b>                                                                                      | <b>3a</b>                                                                                    | <b>3b</b>                                                                                     |
|---------------------------------------------------------------------------------------------------|-----------------------------------------------------------------------------------------------|------------------------------------------------------------------------------------------------|----------------------------------------------------------------------------------------------|-----------------------------------------------------------------------------------------------|
| Empirical formula                                                                                 | C <sub>46</sub> H <sub>28</sub> F <sub>2</sub> Fe <sub>2</sub> N <sub>8</sub> Se <sub>2</sub> | C <sub>46</sub> H <sub>28</sub> Cl <sub>2</sub> Fe <sub>2</sub> N <sub>8</sub> Se <sub>2</sub> | C <sub>46</sub> H <sub>28</sub> F <sub>2</sub> Fe <sub>2</sub> N <sub>8</sub> S <sub>2</sub> | C <sub>46</sub> H <sub>28</sub> Cl <sub>2</sub> Fe <sub>2</sub> N <sub>8</sub> S <sub>2</sub> |
| Formula weight                                                                                    | 1000.38                                                                                       | 1033.28                                                                                        | 906.58                                                                                       | 939.48                                                                                        |
| Crystal system                                                                                    | Triclinic                                                                                     | Triclinic                                                                                      | Triclinic                                                                                    | Triclinic                                                                                     |
| <i>a</i> / Å                                                                                      | 8.7623(9)                                                                                     | 8.7700(12)                                                                                     | 8.7638(7)                                                                                    | 8.8205(8)                                                                                     |
| <i>b</i> / Å                                                                                      | 9.1250(10)                                                                                    | 9.2110(12)                                                                                     | 9.0088(7)                                                                                    | 9.0902(8)                                                                                     |
| <i>c</i> / Å                                                                                      | 13.4315(14)                                                                                   | 13.5822(19)                                                                                    | 13.4894(11)                                                                                  | 13.6352(13)                                                                                   |
| $\alpha$ / deg                                                                                    | 90.012(2)                                                                                     | 89.993(3)                                                                                      | 90.103(2)                                                                                    | 90.168(2)                                                                                     |
| $\beta$ / deg                                                                                     | 106.064(2)                                                                                    | 75.599(3)                                                                                      | 106.079(2)                                                                                   | 104.444(2)                                                                                    |
| $\gamma$ / deg                                                                                    | 107.409(2)                                                                                    | 71.823(3)                                                                                      | 107.018(2)                                                                                   | 107.949(2)                                                                                    |
| <i>V</i> / Å <sup>3</sup>                                                                         | 980.68(18)                                                                                    | 1006.1(2)                                                                                      | 974.55(13)                                                                                   | 1003.40(16)                                                                                   |
| Space group                                                                                       | <i>P</i> –1                                                                                   | <i>P</i> –1                                                                                    | <i>P</i> –1                                                                                  | <i>P</i> –1                                                                                   |
| <i>Z</i> value                                                                                    | 1                                                                                             | 1                                                                                              | 1                                                                                            | 1                                                                                             |
| <i>D</i> <sub>calc</sub> / g cm <sup>–3</sup>                                                     | 1.694                                                                                         | 1.705                                                                                          | 1.545                                                                                        | 1.555                                                                                         |
| <i>F</i> (000)                                                                                    | 498                                                                                           | 514                                                                                            | 462                                                                                          | 478                                                                                           |
| No. of reflections                                                                                | 7290                                                                                          | 7433                                                                                           | 7228                                                                                         | 7478                                                                                          |
| No. of observations                                                                               | 4807                                                                                          | 4946                                                                                           | 4769                                                                                         | 4941                                                                                          |
| Parameters                                                                                        | 282                                                                                           | 282                                                                                            | 282                                                                                          | 282                                                                                           |
| Temperature / K                                                                                   | 173                                                                                           | 173                                                                                            | 173                                                                                          | 173                                                                                           |
| <i>R</i> <sub>1</sub> <sup>a</sup> , <i>R</i> <sub>w</sub> <sup>b</sup> ( <i>I</i> > 2 $\sigma$ ) | 0.0410, 0.1039                                                                                | 0.0599, 0.1526                                                                                 | 0.0438, 0.1068                                                                               | 0.0664, 0.1705                                                                                |
| <i>R</i> <sub>1</sub> <sup>a</sup> , <i>R</i> <sub>w</sub> <sup>b</sup> (all data)                | 0.0603, 0.1132                                                                                | 0.1001, 0.1787                                                                                 | 0.0585, 0.1143                                                                               | 0.0805, 0.1809                                                                                |
| Goodness of fit                                                                                   | 1.052                                                                                         | 1.059                                                                                          | 1.048                                                                                        | 1.046                                                                                         |

<sup>a</sup>*R*<sub>1</sub> =  $\Sigma ||F_o| - |F_c|| / \Sigma |F_o|$ ; <sup>b</sup>*R*<sub>w</sub> =  $[\Sigma w (F_o^2 - F_c^2)^2 / \Sigma w (F_o^2)^2]^{1/2}$

**Table S3.** Crystallographic Parameters.

|                                                                                          | <b>3c</b>       | <b>3d</b>        | <b>4b</b>      | <b>4c</b>      |
|------------------------------------------------------------------------------------------|-----------------|------------------|----------------|----------------|
| Empirical formula                                                                        | C46H26F4Fe2N8S2 | C46H26Cl4Fe2N8S2 | C48H32Cl2Fe2N8 | C48H30F4Fe2N8  |
| Formula weight                                                                           | 942.57          | 1008.37          | 903.42         | 906.51         |
| Crystal system                                                                           | Triclinic       | Triclinic        | Triclinic      | Triclinic      |
| <i>a</i> / Å                                                                             | 8.7754(10)      | 8.8175(12)       | 8.654(3)       | 8.7951(13)     |
| <i>b</i> / Å                                                                             | 9.0556(11)      | 9.1617(12)       | 9.111(3)       | 9.1673(13)     |
| <i>c</i> / Å                                                                             | 13.2444(16)     | 13.8108(18)      | 13.738(4)      | 13.4002(18)    |
| $\alpha$ / deg                                                                           | 91.068(2)       | 90.540(2)        | 89.225(5)      | 92.358(12)     |
| $\beta$ / deg                                                                            | 105.733(2)      | 103.988(2)       | 75.034(5)      | 104.633(12)    |
| $\gamma$ / deg                                                                           | 108.766(2)      | 109.5500(10)     | 73.200(5)      | 109.317(11)    |
| <i>V</i> / Å <sup>3</sup>                                                                | 952.7(2)        | 1015.2(2)        | 999.6(5)       | 977.3(2)       |
| Space group                                                                              | <i>P</i> -1     | <i>P</i> -1      | <i>P</i> -1    | <i>P</i> -1    |
| <i>Z</i> value                                                                           | 1               | 1                | 1              | 1              |
| <i>D</i> <sub>calc</sub> / g cm <sup>-3</sup>                                            | 1.643           | 1.649            | 1.501          | 1.540          |
| <i>F</i> (000)                                                                           | 478             | 510              | 462            | 462            |
| No. of reflections                                                                       | 6775            | 4872             | 4231           | 4780           |
| No. of observations                                                                      | 4605            | 3535             | 3346           | 4487           |
| Parameters                                                                               | 281             | 281              | 290            | 284            |
| Temperature / K                                                                          | 173             | 150              | 173            | 296            |
| <i>R</i> <sub>1</sub> <sup>a</sup> , <i>R</i> <sub>w</sub> <sup>b</sup> ( <i>I</i> > 2σ) | 0.0465, 0.1149  | 0.0373, 0.0839   | 0.0783, 0.1838 | 0.0314, 0.0768 |
| <i>R</i> <sub>1</sub> <sup>a</sup> , <i>R</i> <sub>w</sub> <sup>b</sup> (all data)       | 0.0600, 0.1227  | 0.0500, 0.0911   | 0.1437, 0.2199 | 0.0433, 0.0811 |
| Goodness of fit                                                                          | 1.036           | 1.027            | 0.969          | 1.020          |

$$^a R_1 = \sum ||F_o| - |F_c|| / \sum |F_o|; \quad ^b R_w = [\sum w (F_o^2 - F_c^2)^2 / \sum w (F_o^2)^2]^{1/2}$$

**Table S5.** Redox potentials of acceptors (in V vs. [FeCp<sub>2</sub>]<sup>0/+</sup>) measured in CH<sub>2</sub>Cl<sub>2</sub> solutions containing Bu<sub>4</sub>NClO<sub>4</sub> (0.1 mol dm<sup>-3</sup>) as the supporting electrolyte (scan rate 0.1 Vs<sup>-1</sup>).**Table S4.** Redox potentials of donors (in V vs. [FeCp<sub>2</sub>]<sup>0/+</sup>) measured in CH<sub>2</sub>Cl<sub>2</sub> solutions containing Bu<sub>4</sub>NClO<sub>4</sub> (0.1 mol dm<sup>-3</sup>) as the supporting electrolyte (scan rate 0.1 Vs<sup>-1</sup>).

| Compound                             | Bifc <sup>+0</sup>                 |                                    |                                      | Bifc <sup>2+/+</sup>               |                                    |                                      | $\Delta E_{1/2}$ |
|--------------------------------------|------------------------------------|------------------------------------|--------------------------------------|------------------------------------|------------------------------------|--------------------------------------|------------------|
|                                      | <i>E</i> <sub>p</sub> <sup>a</sup> | <i>E</i> <sub>p</sub> <sup>c</sup> | <i>E</i> <sub>1/2</sub> <sup>1</sup> | <i>E</i> <sub>p</sub> <sup>a</sup> | <i>E</i> <sub>p</sub> <sup>c</sup> | <i>E</i> <sub>1/2</sub> <sup>2</sup> |                  |
| I <sub>2</sub> -bifc ( <b>1</b> )    | 0.09                               | 0.02                               | 0.06                                 | 0.40                               | 0.31                               | 0.35                                 | 0.30             |
| SeMe <sub>2</sub> -Bifc ( <b>2</b> ) | -0.04                              | -0.11                              | -0.08                                | 0.23                               | 0.17                               | 0.20                                 | 0.28             |
| SMe <sub>2</sub> -Bifc ( <b>3</b> )  | -0.06                              | -0.15                              | -0.11                                | 0.23                               | 0.13                               | 0.18                                 | 0.29             |
| Et <sub>2</sub> -bifc ( <b>4</b> )   | -0.13                              | -0.20                              | -0.16                                | 0.22                               | 0.14                               | 0.18                                 | 0.34             |

  

| Compound                           | [A] <sup>-0</sup>                  |                                    |                                      | [A] <sup>2-/-</sup>                |                                    |                                      | $\Delta E_{1/2}$ |
|------------------------------------|------------------------------------|------------------------------------|--------------------------------------|------------------------------------|------------------------------------|--------------------------------------|------------------|
|                                    | <i>E</i> <sub>p</sub> <sup>a</sup> | <i>E</i> <sub>p</sub> <sup>c</sup> | <i>E</i> <sub>1/2</sub> <sup>1</sup> | <i>E</i> <sub>p</sub> <sup>a</sup> | <i>E</i> <sub>p</sub> <sup>c</sup> | <i>E</i> <sub>1/2</sub> <sup>2</sup> |                  |
| F <sub>1</sub> -TCNQ ( <b>a</b> )  | -0.06                              | -0.14                              | -0.10                                | -0.60                              | -0.74                              | -0.67                                | 0.57             |
| Cl <sub>1</sub> -TCNQ ( <b>b</b> ) | -0.04                              | -0.11                              | -0.07                                | -0.55                              | -0.66                              | -0.61                                | 0.53             |
| F <sub>2</sub> -TCNQ ( <b>c</b> )  | 0.03                               | -0.05                              | -0.01                                | -0.51                              | -0.63                              | -0.57                                | 0.56             |
| Cl <sub>2</sub> -TCNQ ( <b>d</b> ) | 0.07                               | 0.00                               | 0.03                                 | -0.43                              | -0.55                              | -0.49                                | 0.52             |

**Table S6.** Unit cell volumes of **3a–c** at different temperatures.

| compound  | $V(293\text{ K}) / \text{\AA}^3$ | $V(173\text{ K}) / \text{\AA}^3$ | $\Delta V / \text{\AA}^3$ |
|-----------|----------------------------------|----------------------------------|---------------------------|
| <b>3a</b> | 992.3                            | 974.6                            | -17.8 (-1.8%)             |
| <b>3b</b> | 1026.2                           | 1003.4                           | -22.8 (-2.2%)             |
| <b>3c</b> | 969.3                            | 952.7                            | -16.6 (-1.7%)             |
